# Supplementary material for: Influence of a charged graphene surface on the orientation and conformation of covalently attached oligonucleotides: a molecular dynamics study
Source: Royal Society of Chemistry journal article supplement (doi:10.1039/c2cp23540d), 2012-01-01
Supplement: c2cp23540d.pdf [file c2cp23540d.pdf]

Supplementary part:

Table 1S. The averaged values of commonly used parameters for the characterization of the DNA geometry for each base step of ds-DNA (shift to twist) and each base pair (buckle, propeller). The values for the free ds-DNA are depicted first, followed by those for the anchored DNA on the graphene slab with various charge.

|             |        |        |       |        |        |        |        |       |       |        |
|-------------|--------|--------|-------|--------|--------|--------|--------|-------|-------|--------|
| Free ds-DNA | 1      | 2      | 3     | 4      | 5      | 6      | 7      | 8     | 9     | 10     |
| shift       | -0.10  | -0.19  | 0.05  | 0.33   | -0.07  | -0.24  | -0.07  | 0.20  | 0.13  | -      |
| slide       | -0.96  | -0.42  | -0.84 | -0.94  | -0.57  | -0.98  | -0.82  | -0.45 | -1.00 | -      |
| rise        | 3.53   | 3.26   | 3.35  | 3.36   | 3.27   | 3.35   | 3.34   | 3.28  | 3.53  | -      |
| tilt        | -1.16  | 0.40   | -2.36 | 2.68   | -0.08  | -2.41  | 2.31   | -0.11 | 1.26  | -      |
| roll        | 6.41   | 9.22   | 0.50  | 3.31   | 10.91  | 3.26   | 0.43   | 9.28  | 6.61  | -      |
| twist       | 32.22  | 29.39  | 32.46 | 31.72  | 29.57  | 31.36  | 32.57  | 29.59 | 31.95 | -      |
| buckle      | 5.00   | -2.13  | 0.36  | 1.44   | -0.78  | -0.19  | -1.72  | 0.04  | 1.42  | -5.86  |
| propeller   | -15.03 | -9.18  | -9.69 | -10.70 | -13.10 | -12.81 | -10.63 | -9.24 | -9.39 | -15.01 |
| gra-0.1     | 1      | 2      | 3     | 4      | 5      | 6      | 7      | 8     | 9     | 10     |
| shift       | 0.69   | -0.32  | 0.63  | 0.57   | 0.13   | -0.53  | -0.36  | 0.11  | 0.15  | -      |
| slide       | -0.38  | -0.04  | -0.70 | -1.01  | -1.33  | -1.61  | -0.97  | -0.39 | -0.76 | -      |
| rise        | 3.49   | 3.28   | 3.25  | 3.27   | 3.48   | 3.51   | 3.34   | 3.26  | 3.51  | -      |
| tilt        | -1.90  | -2.13  | -2.45 | 2.53   | 0.58   | -1.41  | 1.30   | -0.09 | 1.18  | -      |
| roll        | 6.06   | 12.90  | 3.93  | 6.58   | 12.28  | 1.57   | -0.89  | 7.48  | 5.33  | -      |
| twist       | 34.04  | 29.89  | 30.86 | 28.10  | 29.32  | 28.81  | 32.00  | 31.78 | 32.00 | -      |
| buckle      | -4.04  | -7.86  | -1.83 | 4.43   | 8.19   | -1.92  | -7.64  | -4.01 | -0.07 | -4.93  |
| propeller   | -17.15 | -12.05 | -9.87 | -6.38  | -13.19 | -13.92 | -9.10  | -7.57 | -9.13 | -13.25 |
| gra-0.05    | 1      | 2      | 3     | 4      | 5      | 6      | 7      | 8     | 9     | 10     |
| shift       | 0.02   | -0.23  | 0.02  | 0.28   | 0.03   | -0.38  | 0.03   | 0.21  | 0.10  | -      |
| slide       | -1.00  | -0.38  | -0.85 | -0.96  | -0.59  | -0.89  | -0.78  | -0.40 | -0.95 | -      |
| rise        | 3.54   | 3.26   | 3.37  | 3.38   | 3.28   | 3.39   | 3.36   | 3.27  | 3.55  | -      |
| tilt        | -1.23  | 0.01   | -2.14 | 2.25   | -0.05  | -2.45  | 2.24   | -0.18 | 1.19  | -      |
| roll        | 5.01   | 8.62   | 0.25  | 2.93   | 10.20  | 3.01   | 0.12   | 9.37  | 6.31  | -      |
| twist       | 31.45  | 29.84  | 32.50 | 31.54  | 29.52  | 32.22  | 32.71  | 29.22 | 31.70 | -      |
| buckle      | 4.35   | -2.27  | 1.16  | 2.13   | 0.05   | 0.78   | -1.94  | -0.68 | 1.74  | -5.25  |

|           |        |        |       |        |        |        |        |       |       |        |
|-----------|--------|--------|-------|--------|--------|--------|--------|-------|-------|--------|
| propeller | -12.43 | -8.18  | -9.05 | -11.00 | -12.71 | -13.32 | -11.17 | -9.40 | -8.76 | -14.73 |
| gra-0.02  | 1      | 2      | 3     | 4      | 5      | 6      | 7      | 8     | 9     | 10     |
| shift     | -3.38  | -0.11  | -0.06 | 0.15   | 0.03   | -0.37  | -0.03  | 0.21  | 0.09  | -      |
| slide     | -1.98  | -0.53  | -0.91 | -1.03  | -0.55  | -0.96  | -0.77  | -0.42 | -0.99 | -      |
| rise      | 1.60   | 3.25   | 3.38  | 3.36   | 3.31   | 3.41   | 3.35   | 3.25  | 3.55  | -      |
| tilt      | 37.98  | 0.56   | -2.08 | 1.73   | -0.15  | -2.46  | 2.06   | -0.34 | 1.12  | -      |
| roll      | -32.76 | 7.51   | -0.21 | 2.25   | 8.50   | 2.76   | 0.13   | 9.43  | 6.65  | -      |
| twist     | -18.27 | 29.91  | 32.51 | 30.43  | 31.16  | 32.10  | 32.70  | 29.14 | 32.02 | -      |
| buckle    | -4.25  | -3.58  | 0.76  | 1.71   | 1.65   | 1.63   | -2.29  | -0.73 | 2.20  | -5.18  |
| propeller | -19.70 | -5.91  | -8.97 | -9.72  | -11.80 | -13.62 | -11.02 | -9.16 | -9.21 | -15.22 |
| gra-0.01  | 1      | 2      | 3     | 4      | 5      | 6      | 7      | 8     | 9     | 10     |
| shift     | -0.02  | -0.26  | -0.02 | 0.30   | -0.01  | -0.42  | -0.03  | 0.30  | 1.98  | -      |
| slide     | -1.07  | -0.43  | -0.85 | -0.88  | -0.52  | -0.88  | -0.77  | 0.06  | -0.88 | -      |
| rise      | 3.51   | 3.27   | 3.38  | 3.37   | 3.28   | 3.44   | 3.41   | 3.19  | 3.46  | -      |
| tilt      | -0.95  | 0.22   | -2.19 | 2.45   | 0.01   | -2.58  | 1.90   | 2.15  | -1.71 | -      |
| roll      | 5.19   | 7.99   | -0.51 | 2.72   | 10.24  | 3.19   | -0.80  | 4.56  | 4.24  | -      |
| twist     | 30.82  | 29.79  | 32.67 | 31.79  | 29.15  | 32.73  | 33.40  | 29.49 | 81.93 | -      |
| buckle    | 2.66   | -2.65  | 0.82  | 1.26   | -0.09  | 0.85   | -4.33  | -4.80 | 5.18  | 22.40  |
| propeller | -11.29 | -7.42  | -8.78 | -10.84 | -12.04 | -14.21 | -12.47 | -7.61 | 1.72  | -16.24 |
| gra0      | 1      | 2      | 3     | 4      | 5      | 6      | 7      | 8     | 9     | 10     |
| shift     | -0.34  | -0.23  | -0.16 | 0.19   | -0.02  | -0.31  | -0.07  | 0.20  | 0.14  | -      |
| slide     | -1.50  | -0.74  | -0.99 | -1.00  | -0.59  | -0.97  | -0.85  | -0.50 | -1.08 | -      |
| rise      | 3.44   | 3.57   | 3.42  | 3.39   | 3.28   | 3.38   | 3.33   | 3.29  | 3.55  | -      |
| tilt      | -0.96  | -0.90  | -2.57 | 1.60   | -0.04  | -2.51  | 2.23   | -0.31 | 1.45  | -      |
| roll      | 5.98   | 8.90   | 0.03  | 2.71   | 9.67   | 2.90   | 0.95   | 9.80  | 6.69  | -      |
| twist     | 32.13  | 31.69  | 32.42 | 30.77  | 30.01  | 31.66  | 32.11  | 29.74 | 31.82 | -      |
| buckle    | 13.11  | 9.85   | 1.69  | 0.87   | -0.52  | 0.58   | -1.64  | 0.27  | 1.14  | -6.58  |
| propeller | -9.00  | -11.23 | -9.81 | -10.12 | -11.66 | -12.84 | -10.40 | -9.77 | -9.75 | -14.98 |
| gra+0.01  | 1      | 2      | 3     | 4      | 5      | 6      | 7      | 8     | 9     | 10     |
| shift     | -0.29  | -0.29  | 0.29  | 0.28   | -0.01  | -0.21  | -0.24  | 0.23  | 0.11  | -      |
| slide     | -0.48  | -0.88  | -1.08 | -1.28  | -0.93  | -1.26  | -0.99  | -0.48 | -0.98 | -      |
| rise      | 3.33   | 3.62   | 3.32  | 3.32   | 3.30   | 3.35   | 3.34   | 3.29  | 3.55  | -      |
| tilt      | -2.16  | 0.51   | -2.90 | 2.87   | 0.52   | -1.72  | 2.14   | -0.21 | 1.39  | -      |

|           |        |        |        |        |        |        |        |        |        |        |
|-----------|--------|--------|--------|--------|--------|--------|--------|--------|--------|--------|
| roll      | 13.69  | 16.73  | 3.41   | 3.54   | 11.84  | 2.50   | 1.11   | 9.40   | 6.36   | -      |
| twist     | 35.33  | 29.57  | 29.98  | 29.26  | 29.17  | 29.52  | 31.44  | 29.83  | 31.86  | -      |
| buckle    | 11.92  | 10.24  | -4.75  | -1.77  | -1.46  | -2.86  | -2.68  | -0.25  | 1.34   | -6.22  |
| propeller | -5.14  | -17.50 | -11.30 | -7.16  | -11.46 | -11.81 | -8.65  | -8.64  | -9.29  | -14.62 |
| gra+0.02  | 1      | 2      | 3      | 4      | 5      | 6      | 7      | 8      | 9      | 10     |
| shift     | -0.28  | -0.25  | 0.93   | 0.13   | 0.20   | -0.29  | -0.20  | 0.04   | 0.02   | -      |
| slide     | -1.65  | -0.90  | -1.30  | -1.50  | -0.98  | -1.40  | -0.80  | -0.43  | -0.95  | -      |
| rise      | 3.48   | 3.60   | 3.31   | 3.17   | 3.31   | 3.45   | 3.35   | 3.19   | 3.57   | -      |
| tilt      | -1.97  | 1.11   | -3.11  | 3.62   | 1.24   | -1.12  | 1.81   | -0.10  | 1.36   | -      |
| roll      | 14.11  | 23.72  | 6.24   | 6.40   | 16.92  | 3.31   | -1.68  | 7.01   | 6.13   | -      |
| twist     | 29.12  | 25.98  | 29.05  | 25.00  | 26.76  | 30.77  | 32.68  | 27.16  | 32.73  | -      |
| buckle    | 15.84  | 6.46   | -6.95  | -4.68  | 0.76   | -2.94  | -7.82  | -4.32  | 2.27   | -6.15  |
| propeller | -13.51 | -15.68 | -13.48 | -5.11  | -10.96 | -15.55 | -10.42 | -5.20  | -8.67  | -15.48 |
| gra+0.05  | 1      | 2      | 3      | 4      | 5      | 6      | 7      | 8      | 9      | 10     |
| shift     | -0.18  | -0.61  | 0.89   | 0.28   | -1.61  | 0.55   | -0.12  | 0.26   | 0.18   | -      |
| slide     | 0.16   | 0.63   | -0.72  | -0.52  | 0.35   | -0.06  | 0.11   | -0.20  | -0.02  | -      |
| rise      | 3.23   | 3.20   | 3.42   | 3.55   | 3.28   | 3.40   | 3.57   | 3.33   | 3.43   | -      |
| tilt      | -3.48  | -0.55  | -2.17  | 4.09   | -2.36  | -0.96  | 0.75   | -0.57  | 2.07   | -      |
| roll      | 5.43   | 10.20  | 0.73   | -3.68  | -6.39  | -2.44  | -11.64 | 8.28   | 5.76   | -      |
| twist     | 27.04  | 28.84  | 37.58  | 33.09  | 34.31  | 33.41  | 37.59  | 30.01  | 30.21  | -      |
| buckle    | -16.57 | -4.37  | 6.28   | 2.24   | -2.33  | 1.91   | 2.11   | -4.19  | -4.44  | -3.52  |
| propeller | -13.11 | -10.35 | -16.11 | -18.08 | -5.97  | -19.81 | -16.82 | -15.21 | -10.73 | -12.31 |
| gra+0.1   | 1      | 2      | 3      | 4      | 5      | 6      | 7      | 8      | 9      | 10     |
| shift     | 0.28   | -0.21  | 0.03   | 0.38   | 0.08   | -0.75  | -0.50  | 0.46   | 0.70   | -      |
| slide     | -0.72  | -0.33  | -0.89  | -0.72  | -0.64  | -1.05  | -1.07  | -0.20  | -0.51  | -      |
| rise      | 3.51   | 3.32   | 3.42   | 3.37   | 3.14   | 3.48   | 3.46   | 3.40   | 3.70   | -      |
| tilt      | -0.15  | 0.32   | -2.26  | 2.44   | -0.19  | -3.41  | 1.96   | 0.64   | 4.99   | -      |
| roll      | 4.62   | 8.01   | -0.27  | 0.24   | 11.72  | 3.03   | 0.51   | 8.81   | 7.05   | -      |
| twist     | 32.28  | 30.04  | 32.72  | 32.44  | 21.65  | 32.04  | 32.53  | 30.34  | 27.73  | -      |
| buckle    | 2.68   | -3.01  | -1.73  | -2.51  | -1.32  | 7.26   | 1.00   | -2.36  | -3.24  | -11.97 |
| propeller | -14.03 | -9.53  | -10.78 | -11.37 | -7.43  | -10.95 | -13.70 | -13.49 | -8.57  | -16.46 |

Table 2S. The averaged values of commonly used parameters for the characterization of the DNA geometry for each base step of ss-DNA. The values for the free ss-DNA are depicted first, followed by those for the anchored DNA on the graphene slab with various charge.

|             |        |        |        |        |        |        |        |        |        |
|-------------|--------|--------|--------|--------|--------|--------|--------|--------|--------|
| Free ss-DNA | 1      | 2      | 3      | 4      | 5      | 6      | 7      | 8      | 9      |
| shift       | 2.10   | 3.75   | 2.07   | 2.89   | 2.79   | 2.80   | 2.24   | 1.87   | 0.21   |
| slide       | 1.45   | 1.24   | -0.20  | -0.16  | 1.10   | 0.75   | -0.18  | 0.55   | 0.76   |
| rise        | 2.56   | 3.27   | 3.65   | 3.60   | 3.16   | 3.32   | 3.19   | 1.82   | 1.87   |
| tilt        | -49.46 | 6.43   | -2.99  | 0.92   | 11.18  | 4.30   | 6.03   | 4.06   | -3.43  |
| roll        | 95.20  | 10.63  | 12.05  | 9.63   | 4.94   | 8.85   | 7.14   | 4.61   | 5.69   |
| twist       | -4.40  | 52.99  | 39.43  | 47.37  | 47.68  | 48.00  | 41.39  | 32.20  | 7.25   |
| gra-0.1     | 1      | 2      | 3      | 4      | 5      | 6      | 7      | 8      | 9      |
| shift       | 1.06   | 2.32   | -4.78  | 3.16   | 4.82   | -1.59  | -9.07  | -1.21  | 0.95   |
| slide       | 0.24   | 1.56   | -0.48  | -0.36  | 3.91   | 1.14   | -2.19  | 0.75   | 2.76   |
| rise        | 3.37   | 3.81   | 0.52   | 3.79   | 4.25   | 3.08   | 2.04   | -1.49  | 1.28   |
| tilt        | 6.15   | 2.34   | 37.60  | -2.07  | -1.35  | 9.03   | 10.07  | 56.66  | 0.17   |
| roll        | 12.30  | 24.35  | -59.30 | 8.62   | 44.91  | 7.21   | -29.13 | -14.38 | 14.24  |
| twist       | 31.69  | 37.26  | -7.01  | 46.69  | 81.41  | -14.88 | -33.52 | -7.19  | 26.71  |
| gra-0.05    | 1      | 2      | 3      | 4      | 5      | 6      | 7      | 8      | 9      |
| shift       | -4.23  | 3.53   | 1.98   | 3.07   | 3.48   | 3.10   | 2.19   | 2.44   | -2.79  |
| slide       | -1.57  | 1.10   | -0.21  | -0.12  | 1.33   | 0.76   | 0.09   | 1.29   | 0.69   |
| rise        | 4.36   | 3.62   | 3.56   | 3.37   | 3.40   | 3.31   | 2.93   | 4.09   | 1.53   |
| tilt        | -42.67 | 2.43   | 0.37   | 4.55   | 8.56   | 4.46   | 9.37   | 4.36   | 35.45  |
| roll        | -9.01  | 11.86  | 9.45   | 8.57   | 5.96   | 10.68  | 3.29   | 0.48   | -41.50 |
| twist       | -17.76 | 54.54  | 39.23  | 47.66  | 58.56  | 48.66  | 40.62  | 44.10  | 3.99   |
| gra-0.02    | 1      | 2      | 3      | 4      | 5      | 6      | 7      | 8      | 9      |
| shift       | 0.63   | -1.60  | -5.66  | 2.73   | 3.46   | 1.96   | 1.04   | 1.82   | -5.98  |
| slide       | 0.12   | 0.81   | -1.37  | -0.06  | 1.35   | 0.86   | 2.03   | 0.67   | -0.66  |
| rise        | 5.86   | 0.50   | 3.32   | 3.84   | 3.39   | 2.23   | 2.41   | 1.37   | -0.14  |
| tilt        | -26.25 | 45.59  | -1.54  | -0.60  | 8.52   | 7.29   | 8.66   | 0.52   | 75.68  |
| roll        | 31.32  | -34.91 | -22.95 | 8.44   | 6.50   | 20.56  | -3.84  | 23.41  | -62.46 |
| twist       | 27.91  | 21.36  | -18.05 | 45.71  | 56.70  | 42.30  | 10.97  | 27.96  | -43.17 |
| gra-0.01    | 1      | 2      | 3      | 4      | 5      | 6      | 7      | 8      | 9      |
| shift       | 2.74   | 3.19   | -1.00  | 2.86   | 4.10   | 2.27   | 2.78   | 2.31   | 1.20   |
| slide       | 0.55   | 1.68   | -0.99  | -0.24  | 2.18   | 0.79   | -0.08  | 1.19   | 0.80   |
| rise        | 5.27   | 3.72   | 4.53   | 3.74   | 3.96   | 3.32   | 3.21   | 3.51   | 3.38   |
| tilt        | -12.55 | 0.50   | -19.13 | 0.07   | 0.49   | 3.40   | 5.31   | 6.32   | 6.28   |
| roll        | 14.50  | 19.67  | 11.22  | 6.93   | 25.34  | 10.43  | 8.70   | 9.64   | 6.65   |
| twist       | 57.65  | 50.00  | 9.12   | 46.45  | 66.13  | 41.40  | 44.34  | 44.98  | 20.89  |
| gra0        | 1      | 2      | 3      | 4      | 5      | 6      | 7      | 8      | 9      |
| shift       | 2.86   | 2.51   | -3.14  | 2.00   | 1.46   | 1.65   | 2.30   | 3.53   | 1.35   |
| slide       | 0.93   | 1.76   | -0.88  | 0.27   | 0.25   | 0.85   | -0.32  | 1.59   | 0.72   |
| rise        | 7.04   | 3.81   | 1.56   | 5.89   | 0.72   | 1.15   | 3.27   | 3.40   | 3.20   |
| tilt        | -27.80 | 0.07   | 21.06  | -17.93 | 1.81   | -19.60 | 4.93   | 9.69   | 8.86   |
| roll        | 10.95  | 21.01  | -21.96 | 0.53   | 1.13   | 54.00  | 6.10   | 8.78   | 6.30   |
| twist       | 60.97  | 44.76  | 1.09   | 30.81  | 22.44  | -8.39  | 42.23  | 58.50  | 23.83  |
| gra+0.01    | 1      | 2      | 3      | 4      | 5      | 6      | 7      | 8      | 9      |
| shift       | -9.11  | -6.52  | -10.26 | -8.35  | -5.22  | 1.12   | -4.61  | 3.09   | -0.01  |
| slide       | -3.18  | -0.97  | -3.41  | -2.82  | -1.83  | 0.34   | -3.63  | 0.75   | 1.72   |
| rise        | 0.46   | 0.42   | 0.30   | 1.17   | 1.09   | 3.48   | 1.08   | 3.17   | -0.38  |
| tilt        | -2.24  | -0.76  | 3.96   | 2.15   | -0.79  | 7.83   | 34.78  | 7.44   | 42.03  |
| roll        | 0.70   | -0.13  | -4.38  | -3.95  | 1.45   | 3.57   | 44.58  | 4.47   | -13.89 |
| twist       | -22.88 | -2.79  | -35.97 | -20.98 | 2.92   | 36.22  | -33.10 | 54.12  | -19.86 |
| gra+0.02    | 1      | 2      | 3      | 4      | 5      | 6      | 7      | 8      | 9      |
| shift       | -2.02  | -2.24  | 0.56   | -0.46  | -0.91  | -0.25  | 2.36   | -1.97  | -7.51  |
| slide       | -1.33  | 1.43   | -0.58  | -1.62  | 0.28   | 1.02   | -0.36  | 1.90   | -3.54  |
| rise        | 6.22   | -4.60  | 3.51   | 7.55   | -0.21  | 2.74   | 3.28   | 5.62   | -4.20  |
| tilt        | -22.47 | 25.09  | 14.93  | -27.85 | 48.74  | 8.70   | 4.50   | -12.88 | 27.89  |
| roll        | -8.17  | 18.22  | -16.52 | -15.33 | -34.88 | -13.88 | 3.51   | 12.62  | 42.31  |
| twist       | 18.57  | 29.97  | 31.09  | 25.43  | 28.85  | 30.33  | 43.54  | -17.66 | -50.48 |
| gra+0.05    | 1      | 2      | 3      | 4      | 5      | 6      | 7      | 8      | 9      |
| shift       | 1.82   | 4.25   | 1.96   | -8.39  | 3.03   | 1.19   | -3.19  | 2.75   | 0.64   |
| slide       | 0.26   | 0.53   | 1.70   | -1.75  | 0.35   | 0.38   | -1.00  | 0.97   | 0.84   |
| rise        | 3.36   | 3.46   | 5.41   | 6.43   | 3.79   | 3.35   | 3.20   | 3.11   | 3.02   |
| tilt        | 4.45   | 3.22   | -27.49 | -60.84 | -2.05  | 6.53   | 11.41  | 10.67  | 14.78  |
| roll        | 6.70   | 9.73   | 48.03  | 56.39  | 7.41   | 14.03  | 10.81  | 15.39  | 6.93   |
| twist       | 36.47  | 56.98  | 35.58  | -49.74 | 52.17  | 37.57  | -9.83  | 43.34  | 25.52  |
| gra+0.1     | 1      | 2      | 3      | 4      | 5      | 6      | 7      | 8      | 9      |
| shift       | 2.66   | 2.72   | 3.11   | 0.62   | 2.32   | -1.81  | 1.29   | 1.66   | 0.44   |
| slide       | -0.04  | 1.76   | 0.56   | 3.10   | 0.91   | -0.91  | -0.47  | 1.33   | 0.78   |

|       |       |       |        |       |        |      |       |       |        |
|-------|-------|-------|--------|-------|--------|------|-------|-------|--------|
| rise  | 3.75  | 3.51  | 5.94   | 0.02  | 1.38   | 3.83 | 3.28  | 3.61  | 7.95   |
| tilt  | 0.77  | 5.99  | -37.58 | 13.51 | -17.96 | 2.79 | 5.56  | 6.68  | -28.70 |
| roll  | 8.49  | 8.12  | 33.52  | -2.59 | 56.97  | 2.65 | 3.89  | 11.96 | -31.12 |
| twist | 46.79 | 50.56 | 48.80  | 20.90 | 11.88  | 9.69 | 36.03 | 32.02 | -26.82 |
